# Supplementary material
Source: Research Square preprint supplement (doi:10.21203/rs.3.rs-9860979/v1)
Supplement: Supplementary file 1 [file 69f4c696efe6dd195d7844d7.docx]

**
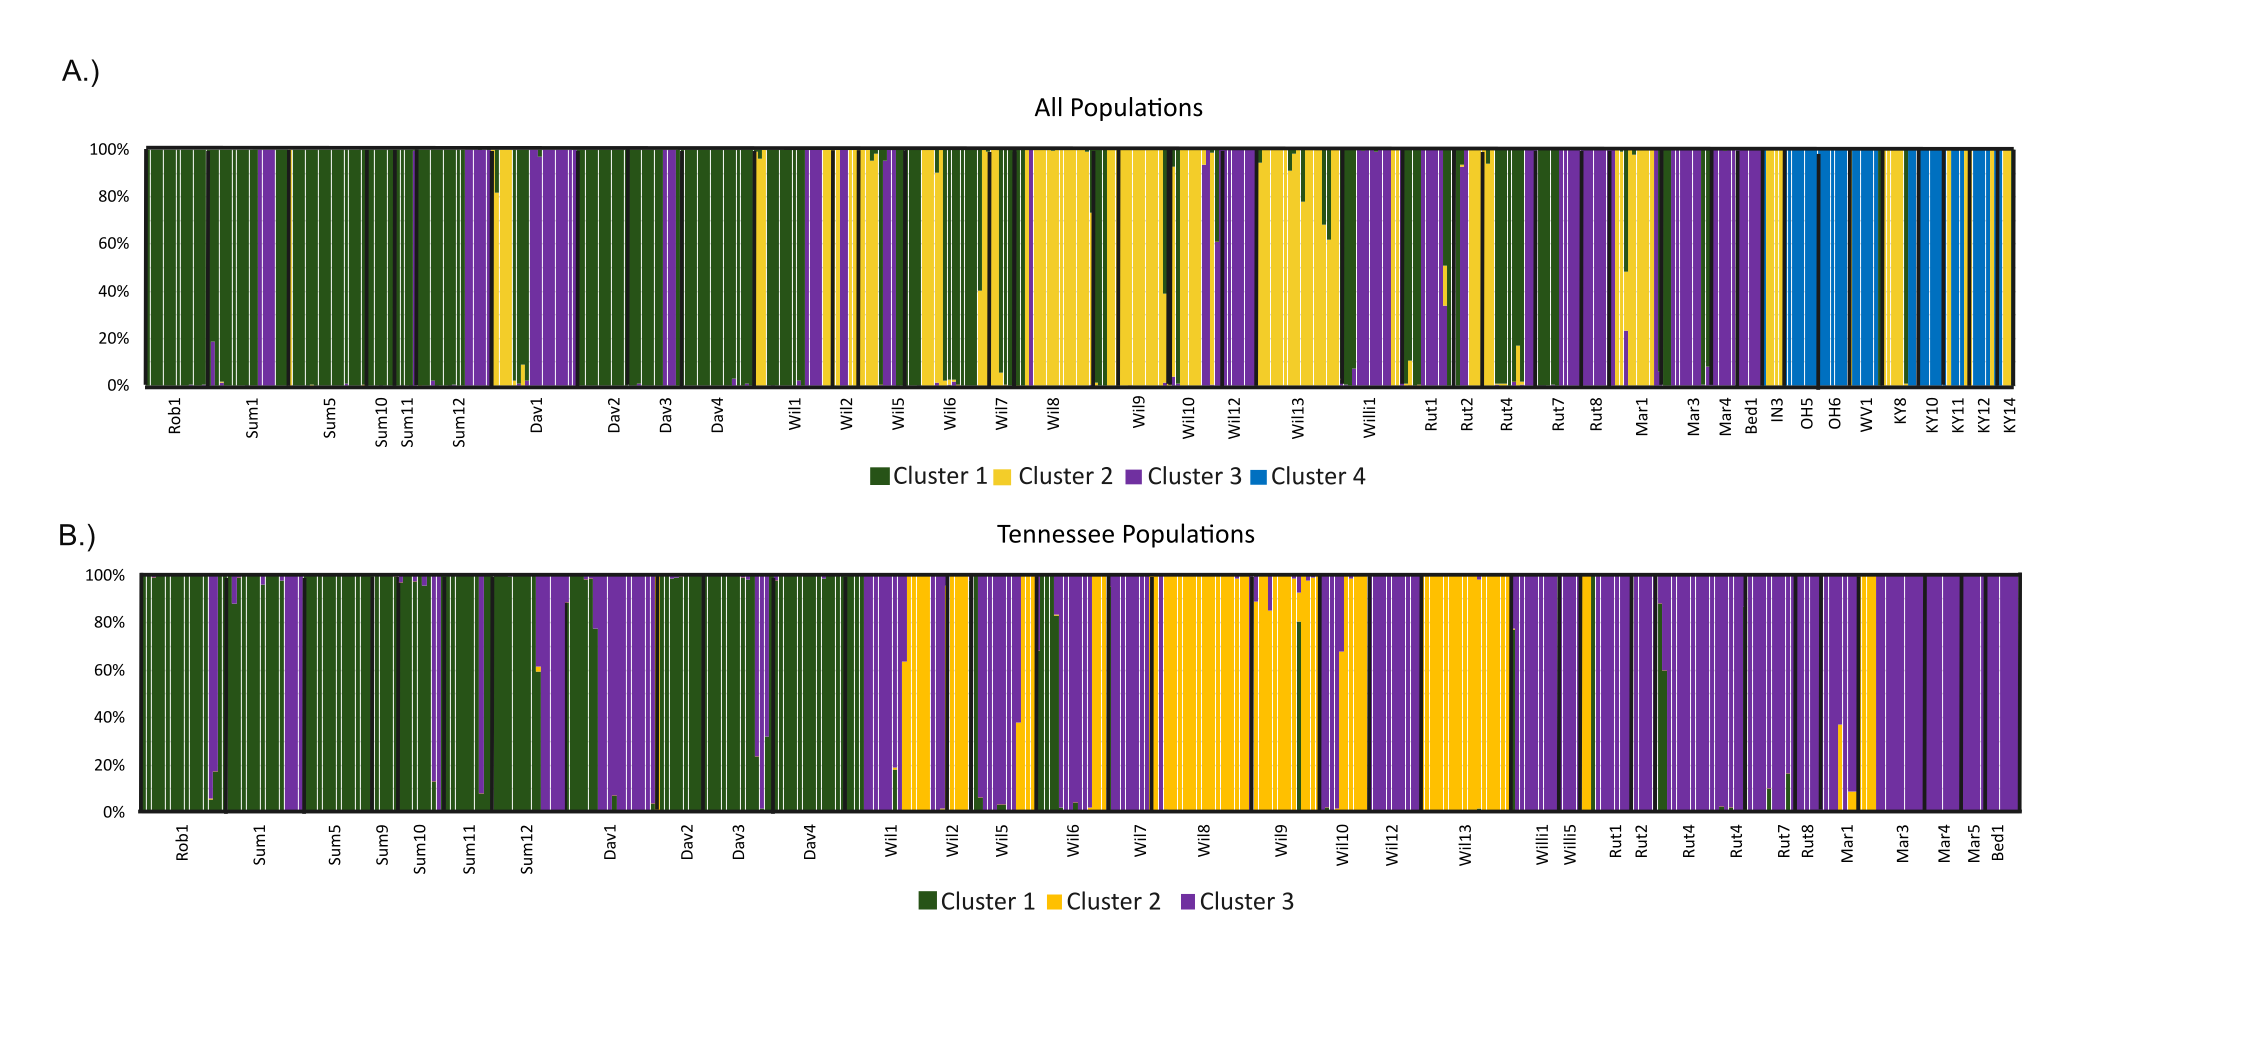
**

**Supplement 1***.* Individual membership probabilities from Analysis of Principal Components (DAPC) of the A) AP SNP dataset and the B) Tennessee SNP dataset. Membership colors correspond to the clusters in DAPC scatterplot (Fig. 4).
